# Supplementary material for: Expression Analysis in Multiple Muscle Groups and Serum Reveals Complexity in the MicroRNA Transcriptome of the mdx Mouse with Implications for Therapy
Source: PubMed Central journal article supplement — Mol Ther Nucleic Acids. 2012 Aug 14;1(8):e39–. doi: 10.1038/mtna.2012.26 (PMC3437806; doi:10.1038/mtna.2012.26), 2012-08-14
Supplement: mtna201226x2.pdf [file mtna201226x2.pdf]

| miRNA       | Eisenberg et al. 2007 |      | Greco et al. 2009 |                 |
|-------------|-----------------------|------|-------------------|-----------------|
|             | miRNA microarray      |      | TaqMan array      |                 |
|             | BMD                   | DMD  | <i>mdx</i>        | DMD             |
|             | various muscles       |      | adductor          | various muscles |
| miR-21      |                       | 3.1  |                   |                 |
| miR-31      |                       |      | 71.5              | 20.1            |
| miR-34c     |                       |      | 6.6               | 6.8             |
| miR-146b    | 11.5                  | 13.0 |                   |                 |
| miR-199a-3p |                       | 3.9  |                   |                 |
| miR-206     |                       |      | 8.8               | 3.9             |
| miR-221     | 3.3                   | 2.9  |                   |                 |
| miR-223     |                       |      | 4.0               | 5.2             |
| miR-1       |                       |      | -2.7              | -3.1            |
| miR-29c     |                       | -6.2 | -6.0              | -2.3            |

**Table S1.**

**Summary of published DMD related miRNA profiling papers.** The subject of study (i.e. DMD patients, BMD patients or *mdx* mice), methodology and type of muscle studied are indicated. Empty cells indicate that a statistically significant change in miRNA expression was not reported.
