# Supplementary material for: Expression Analysis in Multiple Muscle Groups and Serum Reveals Complexity in the MicroRNA Transcriptome of the mdx Mouse with Implications for Therapy
Source: PubMed Central journal article supplement — Mol Ther Nucleic Acids. 2012 Aug 14;1(8):e39–. doi: 10.1038/mtna.2012.26 (PMC3437806; doi:10.1038/mtna.2012.26), 2012-08-14
Supplement: mtna201226x3.pdf [file mtna201226x3.pdf]

| miRNA      | quadriceps |           |           | diaphragm |           |           | heart |           |           |
|------------|------------|-----------|-----------|-----------|-----------|-----------|-------|-----------|-----------|
|            | fold       | p-value   | q-value   | fold      | p-value   | q-value   | fold  | p-value   | q-value   |
| miR-139-5p | -1.20      | 3.270E-03 | 1.005E-02 | -1.32     | 2.217E-03 | 8.525E-03 | -1.17 | 3.471E-04 | 4.362E-02 |
| miR-143    | -1.28      | 5.950E-03 | 1.365E-02 | -1.26     | 4.527E-03 | 1.305E-02 | -1.27 | 6.808E-06 | 2.937E-03 |
| miR-146b   | 3.78       | 8.760E-04 | 4.135E-03 | 1.38      | 2.351E-02 | 3.913E-02 | 1.99  | 1.152E-03 | 6.702E-02 |
| miR-151-3p | -1.79      | 1.328E-04 | 1.918E-03 | -1.48     | 1.401E-02 | 2.702E-02 | -1.33 | 4.437E-03 | 1.007E-01 |
| miR-151-5p | -1.44      | 7.052E-04 | 3.994E-03 | -1.39     | 8.764E-05 | 1.052E-03 | -1.11 | 6.265E-03 | 1.010E-01 |
| miR-185    | -1.92      | 1.299E-04 | 1.918E-03 | -2.10     | 1.486E-04 | 1.327E-03 | -1.20 | 1.704E-03 | 7.325E-02 |
| miR-1902   | -1.26      | 3.287E-02 | 4.226E-02 | 1.43      | 1.292E-02 | 2.532E-02 | 1.32  | 1.187E-02 | 1.284E-01 |
| miR-1944   | 2.77       | 7.887E-04 | 3.994E-03 | 1.68      | 1.241E-03 | 6.060E-03 | 1.40  | 8.959E-03 | 1.152E-01 |
| miR-21     | 2.45       | 2.314E-03 | 7.759E-03 | 2.26      | 1.314E-03 | 6.096E-03 | 2.40  | 2.037E-03 | 7.325E-02 |
| miR-221    | 2.34       | 2.036E-04 | 2.034E-03 | 1.51      | 3.400E-05 | 7.957E-04 | 1.36  | 4.348E-04 | 4.362E-02 |
| miR-222    | 2.28       | 1.303E-03 | 5.331E-03 | 1.49      | 1.779E-04 | 1.431E-03 | 1.19  | 6.036E-03 | 1.010E-01 |
| miR-223    | 3.58       | 4.653E-02 | 5.054E-02 | 1.76      | 8.690E-03 | 1.911E-02 | 1.77  | 4.980E-02 | 2.618E-01 |
| miR-296-3p | 2.03       | 4.925E-02 | 5.233E-02 | 2.80      | 1.255E-04 | 1.247E-03 | 1.38  | 4.116E-02 | 2.433E-01 |
| miR-29c    | -1.97      | 2.762E-03 | 8.921E-03 | -1.40     | 2.392E-02 | 3.913E-02 | 1.29  | 3.735E-02 | 2.427E-01 |
| miR-30a*   | -1.87      | 9.616E-03 | 1.935E-02 | -1.95     | 4.808E-04 | 2.827E-03 | -1.19 | 1.944E-02 | 1.677E-01 |
| miR-345-3p | -1.70      | 1.040E-03 | 4.707E-03 | -1.26     | 1.528E-02 | 2.878E-02 | -1.21 | 1.100E-02 | 1.284E-01 |
| miR-378*   | -1.34      | 1.869E-02 | 2.922E-02 | -1.49     | 1.330E-05 | 5.474E-04 | -1.08 | 1.266E-02 | 1.284E-01 |
| miR-543    | 1.72       | 4.411E-02 | 4.943E-02 | 3.02      | 5.169E-05 | 9.636E-04 | 1.31  | 2.568E-02 | 1.944E-01 |

**Table S2.**

**Table of fold changes, p-values and q-values for differentially expressed miRNAs common to *mdx* quadriceps, diaphragm and heart as measured by miRNA microarray.**
