# Supplementary material for: Expression Analysis in Multiple Muscle Groups and Serum Reveals Complexity in the MicroRNA Transcriptome of the mdx Mouse with Implications for Therapy
Source: PubMed Central journal article supplement — Mol Ther Nucleic Acids. 2012 Aug 14;1(8):e39–. doi: 10.1038/mtna.2012.26 (PMC3437806; doi:10.1038/mtna.2012.26), 2012-08-14
Supplement: mtna201226x4.pdf [file mtna201226x4.pdf]

|                   | miR-1 | miR-21 | miR-29c | miR-31 | miR-34c | miR-133a | miR-146b | miR-199a-3p | miR-206 | miR-221 | miR-223 |
|-------------------|-------|--------|---------|--------|---------|----------|----------|-------------|---------|---------|---------|
| <b>TA</b>         | -1.3  | 2.3    | -1.3    | 49.8   | 3.8     | -1.1     | 1.2      | 1.3         | 3.9     | 2.2     | 1.9     |
| <b>triceps</b>    | -2.0  | 2.7    | -2.0    | 60.5   | 5.0     | -1.4     | 1.0      | 1.2         | 3.9     | 2.8     | 2.6     |
| <b>quadriceps</b> | -1.7  | 2.5    | -1.4    | 70.9   | 5.5     | -1.4     | 1.8      | 1.5         | 4.2     | 2.8     | 2.5     |
| <b>diaphragm</b>  | -2.5  | 1.7    | -1.7    | 6.1    | 4.9     | -1.1     | 1.3      | 1.8         | 3.5     | 1.9     | 1.4     |
| <b>heart</b>      | -1.4  | 1.4    | -1.1    | 1.2    | 1.6     | 1.0      | -1.1     | 1.0         | 1.8     | 1.2     | 1.3     |
| <b>serum</b>      | 43.6  | 1.4    | 3.2     | 2.3    | 1.9     | 50.6     | 1.2      | 1.7         | 52.9    | 1.4     | 1.0     |

**Table S3.**

**Summary of fold changes for all dystromir *mdx* vs wild type comparisons as measured by small RNA TaqMan RT-qPCR.**
