# Supplementary material for: Expression Analysis in Multiple Muscle Groups and Serum Reveals Complexity in the MicroRNA Transcriptome of the mdx Mouse with Implications for Therapy
Source: PubMed Central journal article supplement — Mol Ther Nucleic Acids. 2012 Aug 14;1(8):e39–. doi: 10.1038/mtna.2012.26 (PMC3437806; doi:10.1038/mtna.2012.26), 2012-08-14
Supplement: mtna201226x5.pdf [file mtna201226x5.pdf]

|             | quadriceps   |              | diaphragm    |              | heart       |             |
|-------------|--------------|--------------|--------------|--------------|-------------|-------------|
|             | array        | RT-qPCR      | array        | RT-qPCR      | array       | RT-qPCR     |
| miR-1       | <b>-2.31</b> | -1.79        | ns           | <b>-2.27</b> | ns          | -1.50       |
| miR-21      | <b>2.45</b>  | <b>2.54</b>  | <b>2.26</b>  | <b>1.68</b>  | <b>2.40</b> | 1.39        |
| miR-29c     | <b>-1.97</b> | -1.51        | <b>-1.40</b> | -1.67        | <b>1.29</b> | -1.06       |
| miR-31      | <b>74.30</b> | <b>70.93</b> | <b>4.00</b>  | <b>6.09</b>  | ns          | 1.23        |
| miR-34c     | <b>5.59</b>  | <b>5.54</b>  | <b>4.80</b>  | <b>4.86</b>  | ns          | 1.62        |
| miR-133a    | <b>-1.13</b> | -1.43        | ns           | -1.10        | ns          | -1.02       |
| miR-146b    | <b>3.78</b>  | <b>1.84</b>  | <b>1.38</b>  | 1.33         | <b>1.99</b> | -1.14       |
| miR-199a-3p | <b>1.74</b>  | <b>1.45</b>  | <b>1.46</b>  | 1.76         | ns          | 1.00        |
| miR-206     | <b>1.73</b>  | <b>4.20</b>  | <b>1.39</b>  | <b>3.45</b>  | ns          | <b>1.85</b> |
| miR-221     | <b>2.34</b>  | <b>2.76</b>  | <b>1.50</b>  | <b>1.87</b>  | <b>1.36</b> | 1.24        |
| miR-223     | <b>3.58</b>  | <b>2.46</b>  | <b>1.76</b>  | 1.35         | <b>1.77</b> | 1.28        |

**Table S4.**

**Validation of miRNA microarray by small RNA TaqMan RT-qPCR.** Comparison of miRNA microarray and small RNA TaqMan RT-qPCR for dystromirs of interest. Statistically significant ( $p < 0.05$ ) fold changes are indicated in bold. 'ns' indicates that expression was not significantly changed in the array dataset.
