# Supplementary material for: Expression Analysis in Multiple Muscle Groups and Serum Reveals Complexity in the MicroRNA Transcriptome of the mdx Mouse with Implications for Therapy
Source: PubMed Central journal article supplement — Mol Ther Nucleic Acids. 2012 Aug 14;1(8):e39–. doi: 10.1038/mtna.2012.26 (PMC3437806; doi:10.1038/mtna.2012.26), 2012-08-14
Supplement: mtna201226x6.pdf [file mtna201226x6.pdf]

| primary miRNA          | tissue/mature miRNA | fold change | p-value   | q-value   |
|------------------------|---------------------|-------------|-----------|-----------|
| <b>pri-miR-21</b>      | <b>quadriceps</b>   |             |           |           |
|                        | miR-21              | 2.4493      | 2.314E-03 | 7.759E-03 |
|                        | miR-21*             | 1.3913      | 2.199E-02 | 3.156E-02 |
|                        | <b>diaphragm</b>    |             |           |           |
|                        | miR-21              | 2.2591      | 1.314E-03 | 6.096E-03 |
|                        | miR-21*             | 1.3626      | 1.443E-02 | 2.735E-02 |
| <b>pri-miR-31</b>      | <b>quadriceps</b>   |             |           |           |
|                        | miR-31              | 74.3002     | 2.731E-06 | 2.234E-04 |
|                        | miR-31*             | 11.8677     | 1.905E-04 | 2.034E-03 |
|                        | <b>diaphragm</b>    |             |           |           |
|                        | miR-31              | 4.0047      | 7.636E-05 | 9.998E-04 |
|                        | miR-31*             | 3.2380      | 2.239E-05 | 7.166E-04 |
| <b>pri-miR-34</b>      | <b>quadriceps</b>   |             |           |           |
|                        | miR-34b-3p          | 5.5937      | 1.549E-04 | 2.034E-03 |
|                        | miR-34b-5p          | 1.6915      | 1.122E-02 | 2.139E-02 |
|                        | miR-34c             | 5.5899      | 4.341E-05 | 1.111E-03 |
|                        | miR-34c*            | 4.1830      | 1.374E-03 | 5.527E-03 |
|                        | <b>diaphragm</b>    |             |           |           |
|                        | miR-34b-3p          | 3.5178      | 4.347E-05 | 8.945E-04 |
|                        | miR-34b-5p          | 1.5045      | 6.034E-03 | 1.552E-02 |
|                        | miR-34c             | 4.8033      | 2.888E-05 | 7.957E-04 |
|                        | miR-34c*            | 3.4774      | 1.631E-03 | 7.339E-03 |
| <b>pri-miR-199a</b>    | <b>quadriceps</b>   |             |           |           |
|                        | miR-199a-3p         | 1.7414      | 3.254E-04 | 2.700E-03 |
|                        | miR-199a-5p         | 2.0624      | 1.627E-05 | 5.706E-04 |
|                        | <b>diaphragm</b>    |             |           |           |
|                        | miR-199a-3p         | 1.4592      | 1.290E-02 | 2.532E-02 |
|                        | miR-199a-5p         | 1.8950      | 1.091E-04 | 1.221E-03 |
| <b>pri-miR-221/222</b> | <b>quadriceps</b>   |             |           |           |
|                        | miR-221             | 2.3383      | 2.036E-04 | 2.034E-03 |
|                        | miR-222             | 2.2782      | 1.303E-03 | 5.331E-03 |
|                        | <b>diaphragm</b>    |             |           |           |
|                        | miR-221             | 1.5050      | 3.400E-05 | 7.957E-04 |
|                        | miR-222             | 1.4887      | 1.779E-04 | 1.431E-03 |
|                        | <b>heart</b>        |             |           |           |
|                        | miR-221             | 1.3596      | 4.348E-04 | 4.362E-02 |
| miR-222                | 1.1857              | 6.036E-03   | 1.010E-01 |           |

Table S5.

Concordantly changed mature dystromirs derived from common primary-miRNA transcripts in *mdx* quadriceps, diaphragm and heart.
