# Supplementary material for: Expression Analysis in Multiple Muscle Groups and Serum Reveals Complexity in the MicroRNA Transcriptome of the mdx Mouse with Implications for Therapy
Source: PubMed Central journal article supplement — Mol Ther Nucleic Acids. 2012 Aug 14;1(8):e39–. doi: 10.1038/mtna.2012.26 (PMC3437806; doi:10.1038/mtna.2012.26), 2012-08-14
Supplement: mtna201226x7.pdf [file mtna201226x7.pdf]

| miRNA cluster             | mature miRNA      | fold change | p-value   | q-value   |
|---------------------------|-------------------|-------------|-----------|-----------|
| miR-188/miR-532           | <b>quadriceps</b> |             |           |           |
|                           | miR-188-3p        | 1.2212      | 1.201E-02 | 2.216E-02 |
|                           | miR-188-5p        | 2.2865      | 3.339E-02 | 4.269E-02 |
|                           | miR-532-3p        | 1.3996      | 3.888E-03 | 1.084E-02 |
|                           | miR-532-5p        | 1.4263      | 1.593E-04 | 2.034E-03 |
|                           | <b>diaphragm</b>  |             |           |           |
|                           | miR-188-3p        | 1.5233      | 1.320E-03 | 6.096E-03 |
|                           | miR-188-5p        | 2.4893      | 1.604E-06 | 3.554E-04 |
|                           | miR-532-3p        | 2.1782      | 6.645E-04 | 3.612E-03 |
|                           | miR-532-5p        | 2.3233      | 6.357E-04 | 3.522E-03 |
| miR-296/miR-298           | <b>quadriceps</b> |             |           |           |
|                           | miR-296-3p        | 2.0259      | 4.925E-02 | 5.233E-02 |
|                           | miR-298           | 2.7240      | 4.491E-03 | 1.167E-02 |
|                           | <b>diaphragm</b>  |             |           |           |
|                           | miR-296-3p        | 2.7955      | 1.255E-04 | 1.247E-03 |
|                           | miR-298           | 4.5096      | 3.366E-05 | 7.957E-04 |
| miR-23a/ miR-27a/miR-24-2 | <b>quadriceps</b> |             |           |           |
|                           | miR-23a           | 1.1932      | 4.526E-05 | 1.111E-03 |
|                           | miR-23b           | 1.0453      | 1.900E-02 | 2.922E-02 |
|                           | miR-27a           | 1.4646      | 3.842E-05 | 1.111E-03 |
|                           | miR-27a*          | 1.3656      | 2.526E-02 | 3.463E-02 |
|                           | miR-24-2*         | 1.3405      | 4.360E-02 | 4.909E-02 |
| miR-212/miR-132           | <b>quadriceps</b> |             |           |           |
|                           | miR-212           | 1.7539      | 2.185E-02 | 3.156E-02 |
|                           | miR-132           | 1.8865      | 3.823E-03 | 1.084E-02 |
| miR-337/miR-540/miR-665   | <b>quadriceps</b> |             |           |           |
|                           | miR-337-5p        | -2.1507     | 3.797E-04 | 2.824E-03 |
|                           | miR-540-3p        | -1.6626     | 1.685E-02 | 2.872E-02 |
|                           | miR-665           | -1.7477     | 4.509E-02 | 4.985E-02 |
| miR-411/miR-229           | <b>quadriceps</b> |             |           |           |
|                           | miR-411           | -1.5651     | 3.637E-02 | 4.531E-02 |
|                           | miR-299           | -1.8541     | 4.517E-03 | 1.167E-02 |
|                           | miR-299*          | -2.4882     | 2.881E-02 | 3.852E-02 |
| miR-668/miR-485           | <b>quadriceps</b> |             |           |           |
|                           | miR-668           | -1.3369     | 8.698E-03 | 1.794E-02 |
|                           | miR-485           | -2.9339     | 6.571E-06 | 3.037E-04 |
| miR-494/miR-679           | <b>diaphragm</b>  |             |           |           |
|                           | miR-494           | 1.4014      | 3.591E-05 | 7.957E-04 |
|                           | miR-679           | 1.4012      | 3.599E-03 | 1.139E-02 |
| miR-381/miR-487b          | <b>diaphragm</b>  |             |           |           |
|                           | miR-381           | 4.0546      | 3.379E-04 | 2.295E-03 |
|                           | miR-487b          | 2.2198      | 4.176E-03 | 1.280E-02 |
| miR-181a-1/miR-181b-1     | <b>heart</b>      |             |           |           |
|                           | miR-181a          | -1.1496     | 3.738E-02 | 2.427E-01 |
|                           | miR-181b          | -1.1949     | 1.535E-03 | 7.325E-02 |
| miR-194-2/miR-192         | <b>heart</b>      |             |           |           |
|                           | miR-194           | -1.2899     | 1.176E-02 | 1.284E-01 |
|                           | miR-192           | -1.2749     | 3.668E-02 | 2.427E-01 |

**Table S6.**

**Concordantly changed mature miRNAs derived from common miRNA clusters in *mdx* quadriceps, diaphragm and heart.**
