# Supplementary material for: Expression Analysis in Multiple Muscle Groups and Serum Reveals Complexity in the MicroRNA Transcriptome of the mdx Mouse with Implications for Therapy
Source: PubMed Central journal article supplement — Mol Ther Nucleic Acids. 2012 Aug 14;1(8):e39–. doi: 10.1038/mtna.2012.26 (PMC3437806; doi:10.1038/mtna.2012.26), 2012-08-14
Supplement: mtna201226x8.pdf [file mtna201226x8.pdf]

| miRNA       | gradient | efficiency (%) | R <sup>2</sup> |
|-------------|----------|----------------|----------------|
| miR-1       | -3.617   | 89.015         | 0.992          |
| miR-16      | -3.568   | 90.647         | 0.991          |
| miR-21      | -4.244   | 72.039         | 0.996          |
| miR-29c     | -3.75    | 84.794         | 0.997          |
| miR-31      | -3.858   | 81.63          | 0.994          |
| miR-34c     | -4.512   | 66.587         | 0.960          |
| miR-133a    | -3.75    | 84.782         | 0.996          |
| miR-146b    | -3.96    | 78.865         | 0.993          |
| miR-199a-3p | -4.321   | 70.377         | 0.996          |
| miR-206     | -4.114   | 75.016         | 0.999          |
| miR-221     | -3.704   | 86.184         | 0.983          |
| miR-223     | -4.44    | 67.977         | 0.998          |
| pri-miR-31  | -3.324   | 99.918         | 0.985          |
| pri-miR-34c | -3.447   | 95.025         | 0.897          |
| pri-miR-206 | -3.373   | 84.411         | 0.998          |
| PpiB        | -3.447   | 95.025         | 0.999          |

**Table S7.**

**PCR efficiency determinations for RT-qPCR assays used in this study.** Standard curve gradients, PCR efficiencies and R<sup>2</sup> values are shown. PCR efficiencies were taken into account using the Pfaffl method [41] when calculating fold changes between samples.
