# Supplementary material for: Expression Analysis in Multiple Muscle Groups and Serum Reveals Complexity in the MicroRNA Transcriptome of the mdx Mouse with Implications for Therapy
Source: PubMed Central journal article supplement — Mol Ther Nucleic Acids. 2012 Aug 14;1(8):e39–. doi: 10.1038/mtna.2012.26 (PMC3437806; doi:10.1038/mtna.2012.26), 2012-08-14
Supplement: mtna201226x9.pdf [file mtna201226x9.pdf]

| <b>miRNA</b> | <b>Assay ID</b> |
|--------------|-----------------|
| miR-1        | 002222          |
| miR-16       | 000391          |
| miR-21       | 000397          |
| miR-29c      | 000587          |
| miR-31       | 000185          |
| miR-34c      | 000428          |
| miR-133a     | 002246          |
| miR-146b     | 001097          |
| miR-199a-3p  | 002304          |
| miR-206      | 000510          |
| miR-221      | 000524          |
| miR-223      | 002295          |
| pri-miR-31   | Mm03306874_pri  |
| pri-miR-34c  | Mm03306660_pri  |
| pri-206      | Mm03306546_pri  |
| PpiB         | Mm00478295_m1   |

**Table S8.**

**List of RT-qPCR assays used in this study.**
