# Supplementary figures and images for: Expression Analysis in Multiple Muscle Groups and Serum Reveals Complexity in the MicroRNA Transcriptome of the mdx Mouse with Implications for Therapy
Source: PubMed Central journal article supplement — Mol Ther Nucleic Acids. 2012 Aug 14;1(8):e39–. doi: 10.1038/mtna.2012.26 (PMC3437806; doi:10.1038/mtna.2012.26), 2012-08-14

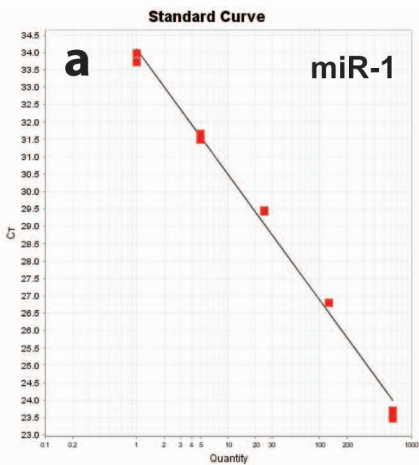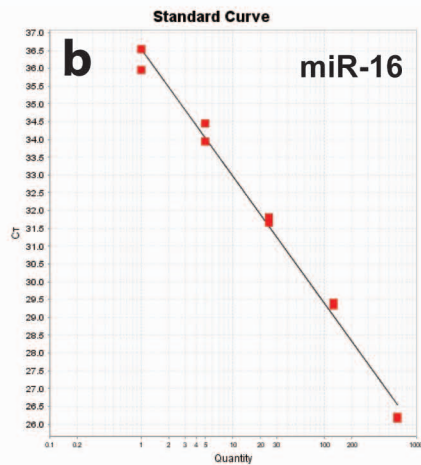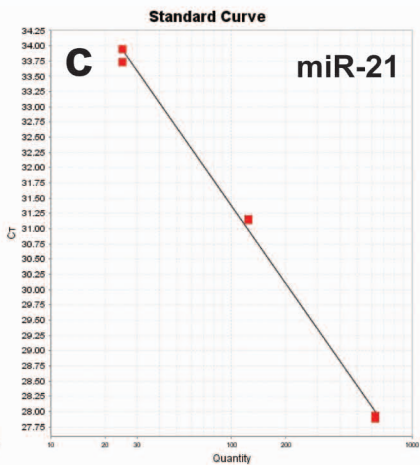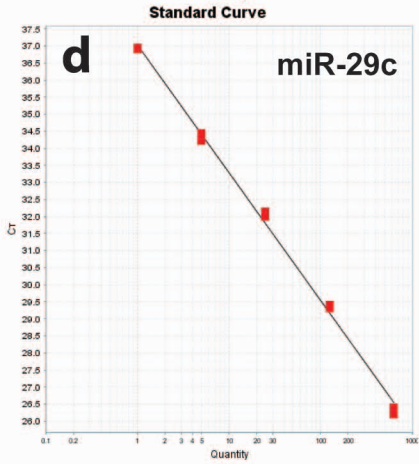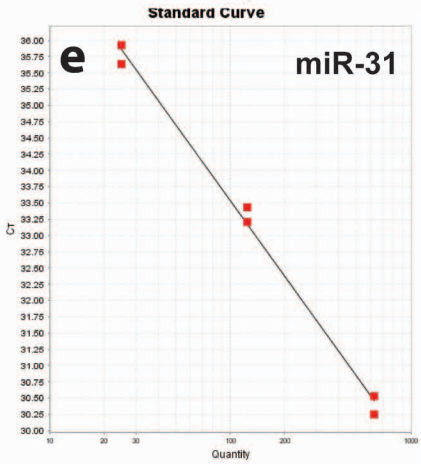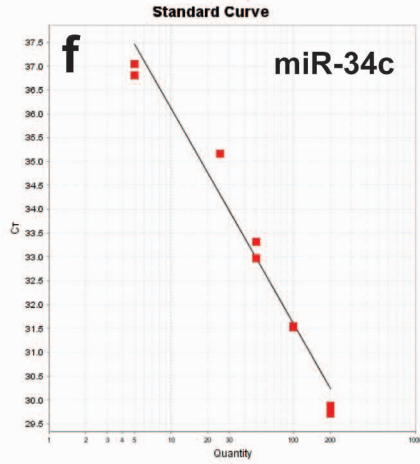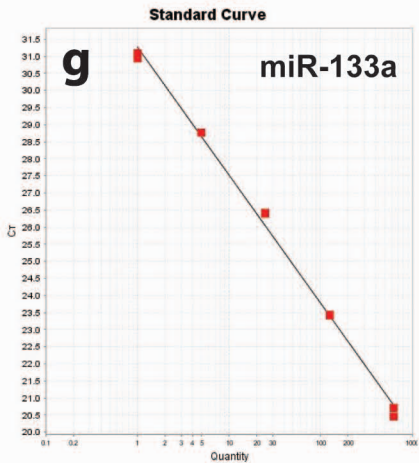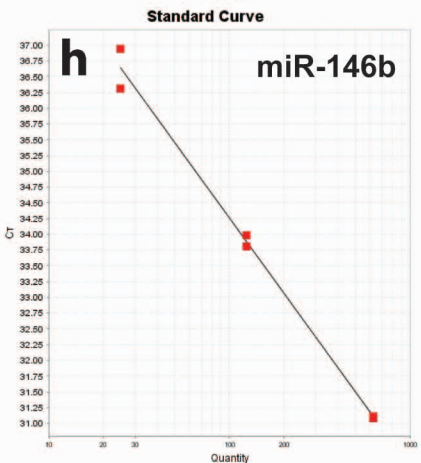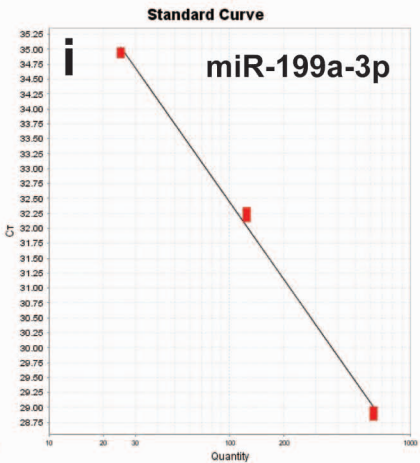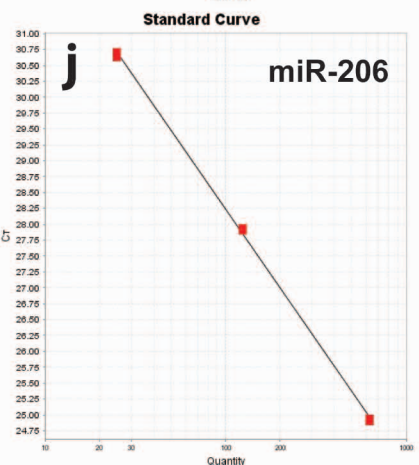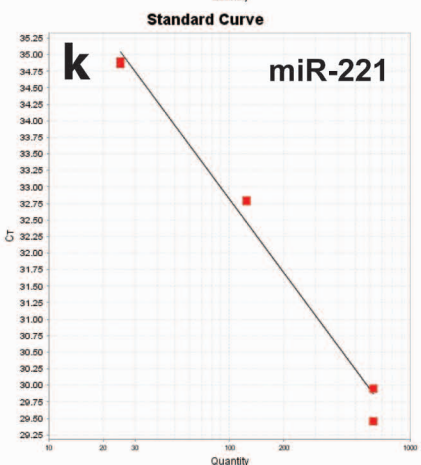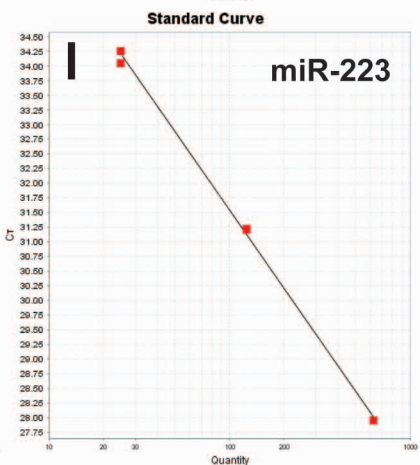

Supplement: mtna201226x1.pdf [file mtna201226x1.pdf]
